# Supplementary material for: Distinct effects of zwitterionic molecules on ionic solvation in (ethylene oxide)10: a molecular dynamics simulation study
Source: Royal Society of Chemistry journal article supplement (doi:10.1039/d2cp02301f), 2023-01-01
Supplement: d2cp02301f1.pdf [file d2cp02301f1.pdf]

## Supplementary Information

### **Distinct Effect of Zwitterionic Molecules on Ionic Solvation in (Ethylene Oxide)<sub>10</sub>: a Molecular Dynamics Simulation Study**

Manh Tien Nguyen<sup>a</sup>, Usman L. Abbas<sup>a</sup>, Qi Qiao<sup>a</sup>, Qing Shao<sup>\*a</sup>

---

<sup>a</sup> Department of Chemical and Materials Engineering, University of Kentucky, Lexington, Kentucky 40506, United States. E-mail: qshao@uky.edu

**Table S1.** Force field parameters. Labels as shown in Figure 1.

| Label             | $\sigma$ (nm) | $\epsilon$ (kJ/mol) | $q$ (e) |
|-------------------|---------------|---------------------|---------|
| MPC               |               |                     |         |
| C1                | 0.355         | 0.317984            | -0.1723 |
| C2                | 0.355         | 0.317984            | -0.1605 |
| C3                | 0.35          | 0.276144            | -0.2016 |
| C4                | 0.355         | 0.29288             | 0.4866  |
| C5                | 0.35          | 0.276144            | -0.0058 |
| C6                | 0.35          | 0.276144            | 0.0849  |
| C7                | 0.35          | 0.276144            | -0.002  |
| C8                | 0.35          | 0.276144            | -0.0943 |
| C9                | 0.35          | 0.276144            | -0.1506 |
| CX                | 0.35          | 0.276144            | -0.1822 |
| CY                | 0.35          | 0.276144            | -0.1863 |
| H11, and H12      | 0.25          | 0.12552             | 0.1428  |
| H31, H32, and H33 | 0.25          | 0.12552             | 0.0983  |
| H51, and H52      | 0.25          | 0.12552             | 0.1025  |
| H61, and H62      | 0.25          | 0.12552             | 0.0971  |
| H71, and H72      | 0.25          | 0.12552             | 0.0811  |
| H81, and H82      | 0.25          | 0.12552             | 0.1306  |
| H91, H92, and H93 | 0.25          | 0.12552             | 0.1608  |
| HX1, HX2, and HX3 | 0.25          | 0.12552             | 0.1519  |
| HY1, HY2, and HY3 | 0.25          | 0.12552             | 0.139   |
| N                 | 0.325         | 0.71128             | -0.0123 |
| O1                | 0.296         | 0.87864             | -0.4613 |
| O2                | 0.29          | 0.58576             | -0.3565 |
| O3                | 0.29          | 0.58576             | -0.9069 |
| O4, and O5        | 0.296         | 0.87864             | -1.1686 |
| O6                | 0.29          | 0.58576             | -0.8125 |
| P                 | 0.374         | 0.8368              | 2.7126  |
| CB                |               |                     |         |
| C                 | 0.355         | 0.29288             | 0.486   |

|                   |       |          |         |
|-------------------|-------|----------|---------|
| C1                | 0.35  | 0.276144 | -0.276  |
| C2                | 0.35  | 0.276144 | 0.023   |
| C3                | 0.355 | 0.29288  | 0.198   |
| C4                | 0.355 | 0.29288  | -0.074  |
| C5                | 0.355 | 0.29288  | -0.077  |
| C6                | 0.35  | 0.276144 | 0.002   |
| C7                | 0.35  | 0.276144 | -0.171  |
| C8                | 0.35  | 0.276144 | -0.29   |
| H11, H12, and H13 | 0.25  | 0.12552  | 0.119   |
| H21, and H22      | 0.25  | 0.12552  | 0.135   |
| H3                | 0.242 | 0.12552  | 0.347   |
| H4                | 0.242 | 0.12552  | 0.234   |
| H5                | 0.242 | 0.12552  | 0.242   |
| H61, and H62      | 0.25  | 0.12552  | 0.145   |
| H71, and H72      | 0.25  | 0.12552  | 0.107   |
| H81, and H82      | 0.25  | 0.12552  | 0.088   |
| N1                | 0.325 | 0.71128  | -0.324  |
| N2                | 0.325 | 0.71128  | -0.213  |
| O1, and O2        | 0.296 | 0.87864  | -0.707  |
| SB                |       |          |         |
| C1                | 0.35  | 0.276144 | -0.2595 |
| C2                | 0.35  | 0.276144 | -0.0352 |
| C3                | 0.355 | 0.29288  | 0.0914  |
| C4                | 0.355 | 0.29288  | -0.1274 |
| C5                | 0.355 | 0.29288  | -0.08   |
| C6                | 0.35  | 0.276144 | -0.066  |
| C7                | 0.35  | 0.276144 | -0.133  |
| C8                | 0.35  | 0.276144 | -0.6807 |
| H11, H12, and H13 | 0.25  | 0.12552  | 0.1196  |
| H21, and H22      | 0.25  | 0.12552  | 0.1324  |
| H3                | 0.242 | 0.12552  | 0.2719  |
| H4                | 0.242 | 0.12552  | 0.25    |
| H5                | 0.242 | 0.12552  | 0.2744  |

|                       |       |          |         |
|-----------------------|-------|----------|---------|
| H61, and H62          | 0.25  | 0.12552  | 0.1318  |
| H71, and H72          | 0.25  | 0.12552  | 0.1279  |
| H81, and H82          | 0.25  | 0.12552  | 0.1329  |
| N1                    | 0.325 | 0.71128  | -0.1837 |
| N2                    | 0.325 | 0.71128  | -0.087  |
| O1, O2, and O3        | 0.296 | 0.71128  | -0.7122 |
| S                     | 0.355 | 1.046    | 1.4926  |
| [TFSI]                |       |          |         |
| N                     | 0.325 | 0.71128  | -0.66   |
| S1 and S2             | 0.355 | 1.046    | 1.02    |
| O11, O12, O21 and O22 | 0.296 | 0.87864  | -0.53   |
| C1 and C2             | 0.35  | 0.27614  | 0.35    |
| F11, F12 and F13      | 0.295 | 0.22175  | -0.16   |
| F21, F22 and F23      | 0.295 | 0.22175  | -0.16   |
| EO <sub>10</sub>      |       |          |         |
| C1, and C20           | 0.35  | 0.276144 | 0.11    |
| H1-3, and H40-42      | 0.25  | 0.12552  | 0.03    |
| O1-10                 | 0.29  | 0.58576  | -0.4    |
| C2-19                 | 0.35  | 0.276144 | 0.14    |
| H4-39                 | 0.25  | 0.12552  | 0.03    |

**Table S2.** Details of the simulation systems

| #       | Li <sup>+</sup> | [TFSI] | EO <sub>10</sub> | ZW     | Li <sup>+</sup> : O(EO <sub>10</sub> ) | Mol. conc.<br>(mol/L) | Total number of atoms |
|---------|-----------------|--------|------------------|--------|----------------------------------------|-----------------------|-----------------------|
| Case A: |                 |        |                  |        |                                        |                       |                       |
| 1       | 200             | 200    | 120              |        | 1:6                                    | 2.3                   | 11840                 |
| 2       | 200             | 200    | 120              | 40 MPC | 1:6                                    | 2.3                   | 13480                 |
| 3       | 200             | 200    | 120              | 40 CB  | 1:6                                    | 2.4                   | 12920                 |
| 4       | 200             | 200    | 120              | 40 SB  | 1:6                                    | 2.4                   | 12960                 |
| Case B: |                 |        |                  |        |                                        |                       |                       |
| 5       | 100             | 100    | 180              |        | 1:18                                   | 1.1                   | 14560                 |
| 6       | 100             | 100    | 180              | 20 MPC | 1:18                                   | 1.1                   | 15380                 |
| 7       | 100             | 100    | 180              | 20 CB  | 1:18                                   | 1.1                   | 15100                 |
| 8       | 100             | 100    | 180              | 20 SB  | 1:18                                   | 1.1                   | 15120                 |

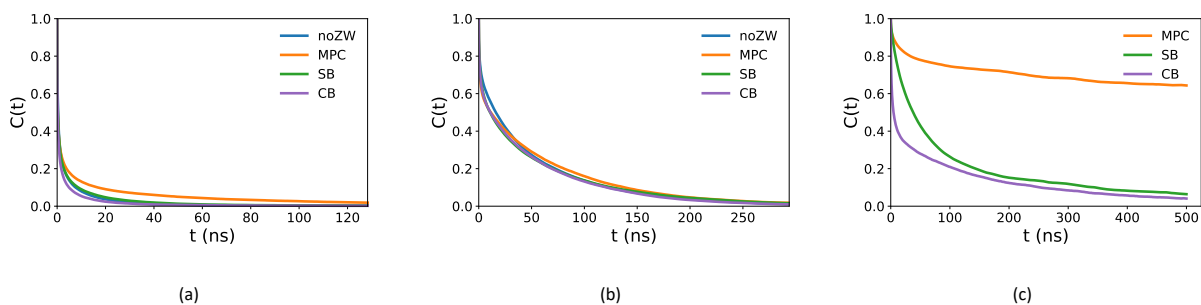**Figure S1.** Residence C(t) curves of (a) Li<sup>+</sup>-O([TFSI]<sup>-</sup>) in, (b) Li<sup>+</sup>-O(EO<sub>10</sub>) and (c) Li<sup>+</sup>-O(ZW) in case-A systems at 600K. Colors correspond to the presence of ZW molecules, as shown in the legends in Figure S1a.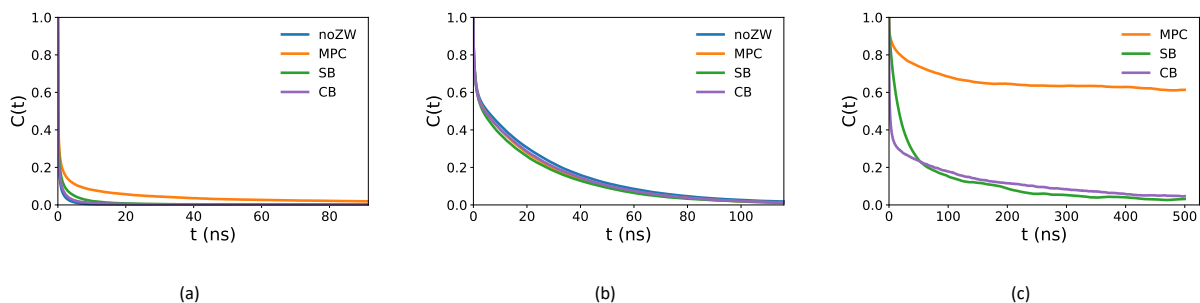**Figure S2.** Residence C(t) curves of (a) Li<sup>+</sup>-O([TFSI]<sup>-</sup>), (b) Li<sup>+</sup>-O(EO<sub>10</sub>) and (c) Li<sup>+</sup>-O(ZW) in case-B systems at 600K. Colors correspond to the presence of ZW molecules, as shown in the legends in Figure S2a.

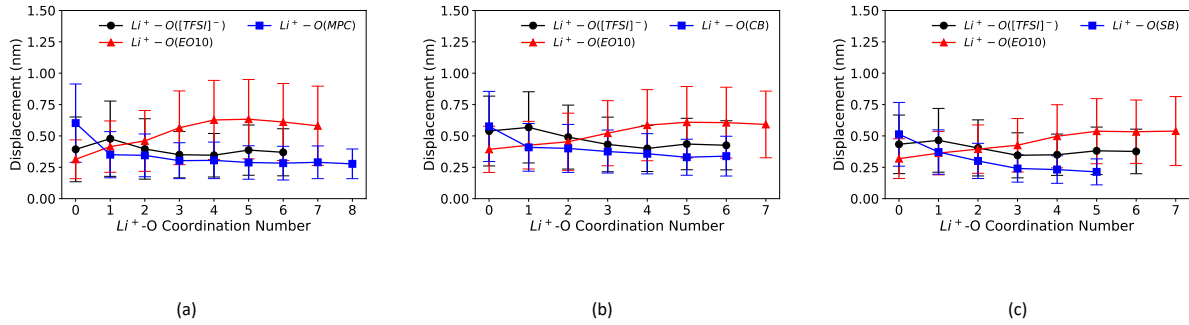

Figure S3. Distance travelled by Li<sup>+</sup> ions in a specific O coordination number over 2-ns for case-A systems (a) with MPC, (b) with CB, and (c) with SB at 600K.

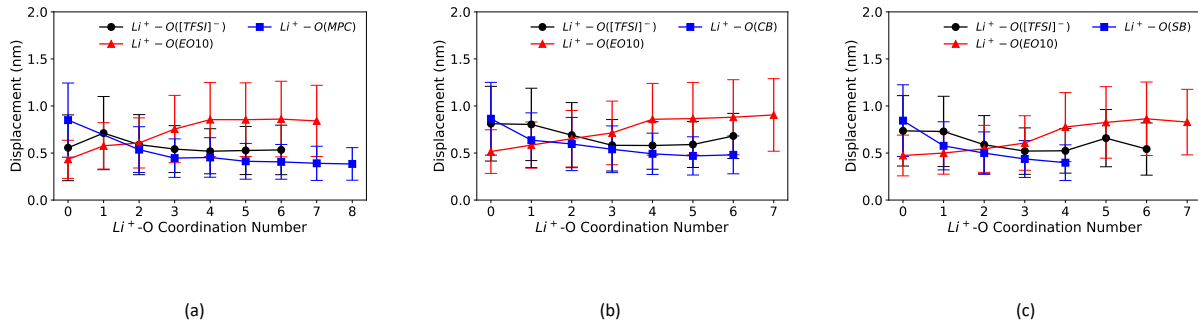

Figure S4. Distance travelled by Li<sup>+</sup> ions in a specific O coordination number over 1-ns for case-B systems (a) with MPC, (b) with CB, and (c) with SB at 600K.

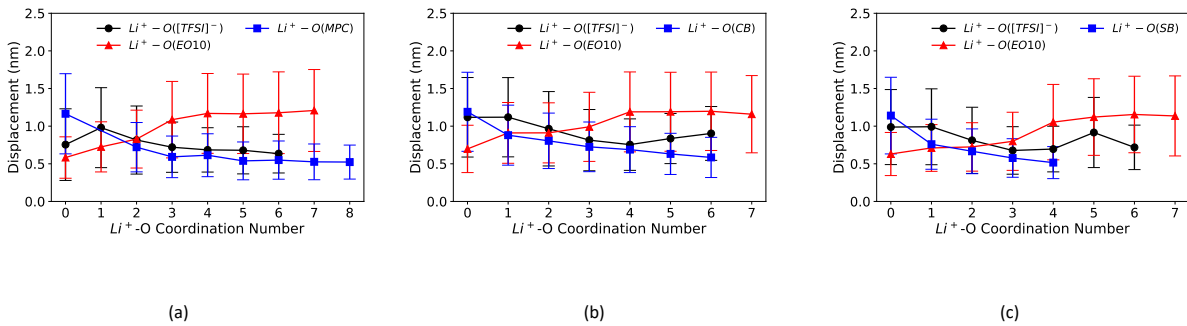

Figure S5. Distance travelled by Li<sup>+</sup> ions in a specific O coordination number over 2-ns for case-B systems (a) with MPC, (b) with CB, and (c) with SB at 600K.

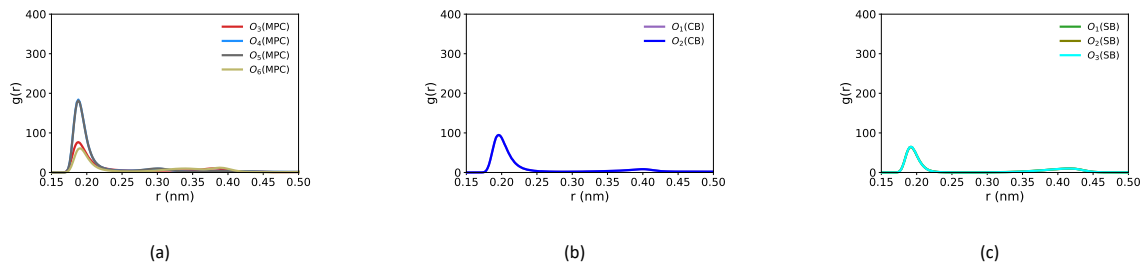

Figure S6. Radial distribution functions of (a) Li<sup>+</sup>-O(MPC), (b) Li<sup>+</sup>-O(CB), and (c) Li<sup>+</sup>-O(SB) in case-A systems at 600K. Atom names are the same as in Figure 1.

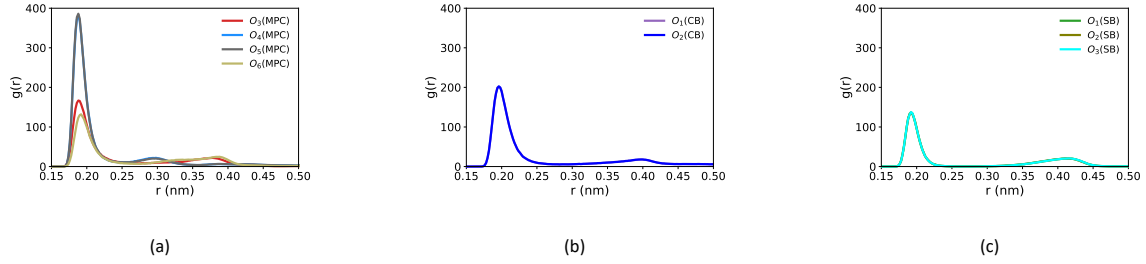

**Figure S7.** Radial distribution functions of (a) Li<sup>+</sup>-O(MPC), (b) Li<sup>+</sup>-O(CB) , and (c) Li<sup>+</sup>-O(SB) in case-B systems at 600K. Atom names are the same as in Figure 1.

**Table S3.** Diffusion coefficient of Li<sup>+</sup> at 600K (nm<sup>2</sup>/ns)

| System | noZW          | MPC           | CB            | SB            |
|--------|---------------|---------------|---------------|---------------|
| A      | 0.019 ± 0.001 | 0.019 ± 0.003 | 0.019 ± 0.001 | 0.015 ± 0.003 |
| B      | 0.128 ± 0.018 | 0.081 ± 0.004 | 0.099 ± 0.006 | 0.090 ± 0.005 |

**Table S4.** Diffusion coefficient of [TFSI]<sup>-</sup> at 600K (nm<sup>2</sup>/ns)

| System | noZW          | MPC           | CB            | SB            |
|--------|---------------|---------------|---------------|---------------|
| A      | 0.027 ± 0.002 | 0.023 ± 0.003 | 0.030 ± 0.001 | 0.024 ± 0.004 |
| B      | 0.161 ± 0.032 | 0.102 ± 0.003 | 0.131 ± 0.014 | 0.131 ± 0.007 |

**Table S5.** Diffusion coefficients of ZW at 600K (nm<sup>2</sup>/ns)

| System | MPC           | CB            | SB            |
|--------|---------------|---------------|---------------|
| A      | 0.007 ± 0.002 | 0.007 ± 0.001 | 0.006 ± 0.001 |
| B      | 0.025 ± 0.008 | 0.048 ± 0.009 | 0.045 ± 0.006 |

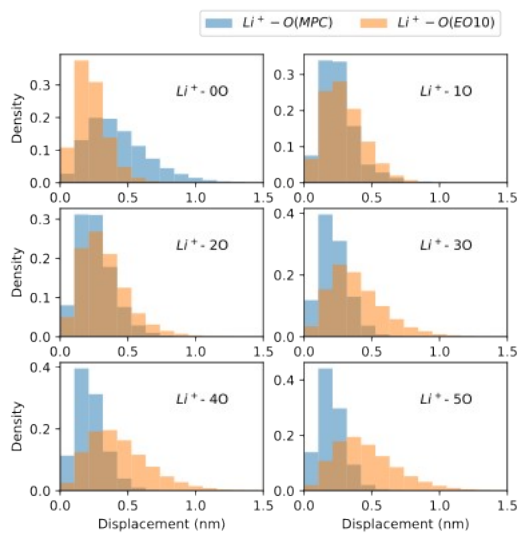

(a)

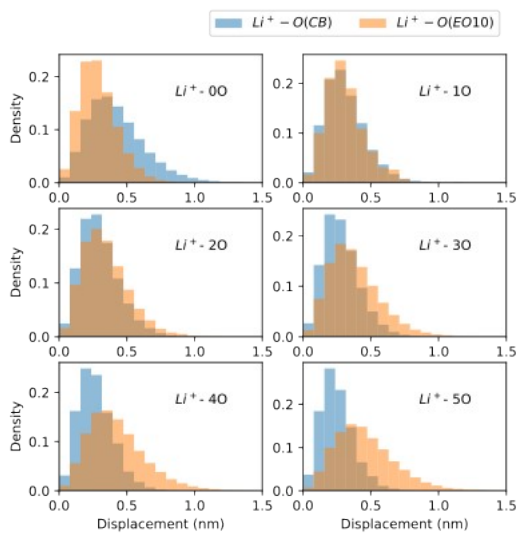

(b)

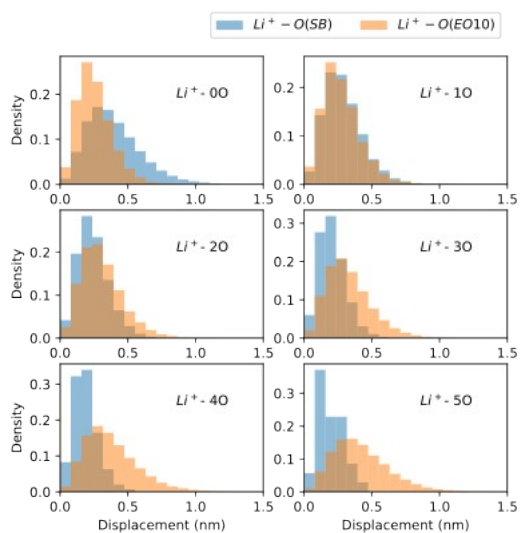

(c)

**Figure S8.** Distribution of distance traveled by  $\text{Li}^+$  ions in a specific O coordination number over 1-ns for systems (a) with MPC, (b) with CB, and (c) with SB in case-A systems at 600K.



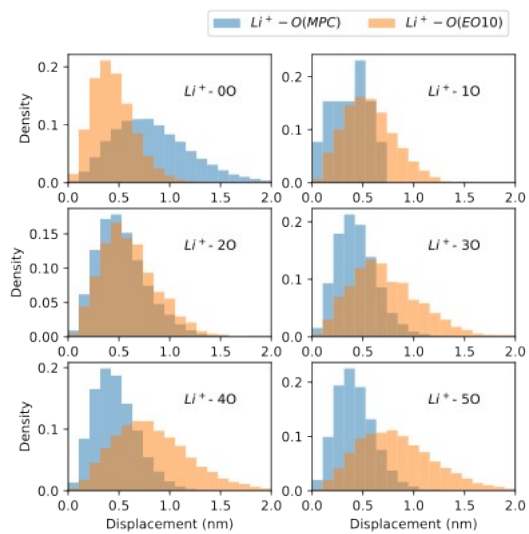

(a)

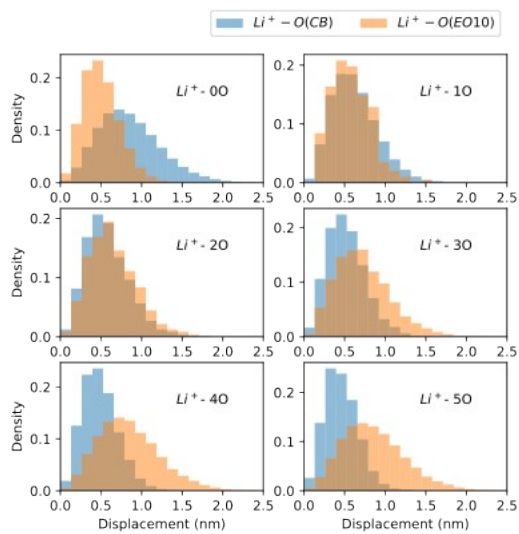

(b)

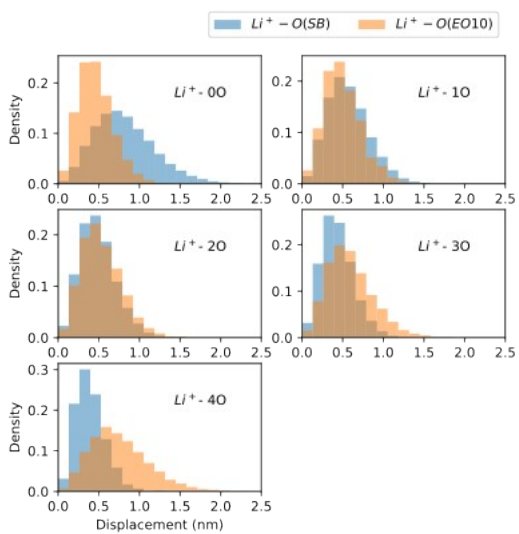

(c)

**Figure S9.** Distribution of distance traveled by  $\text{Li}^+$  ions in a specific O coordination number over 1-ns for systems (a) with MPC, (b) with CB, and (c) with SB in case-B systems at 600K.

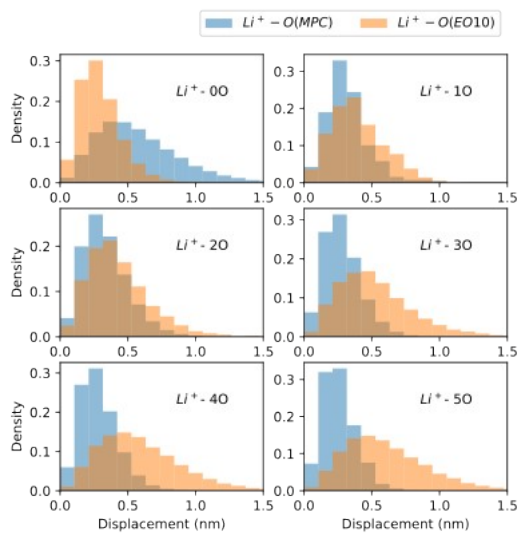

(a)

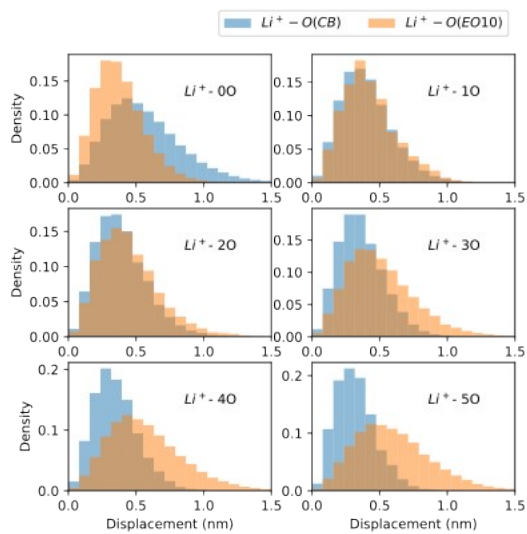

(b)

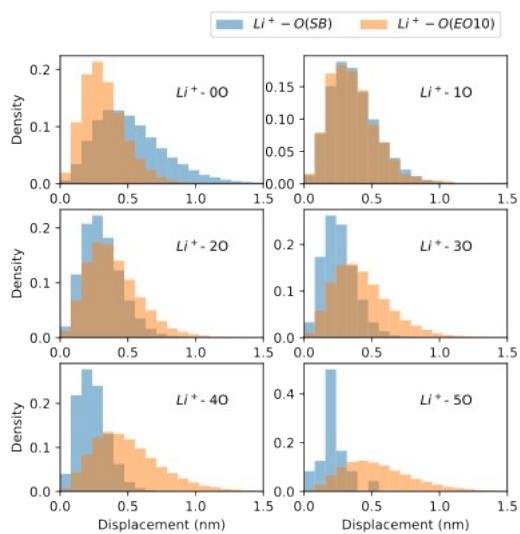

(c)

**Figure S10.** Distribution of distance traveled by  $\text{Li}^+$  ions in a specific O coordination number over 2-ns for systems (a) with MPC, (b) with CB, and (c) with SB in case-A systems at 600K.

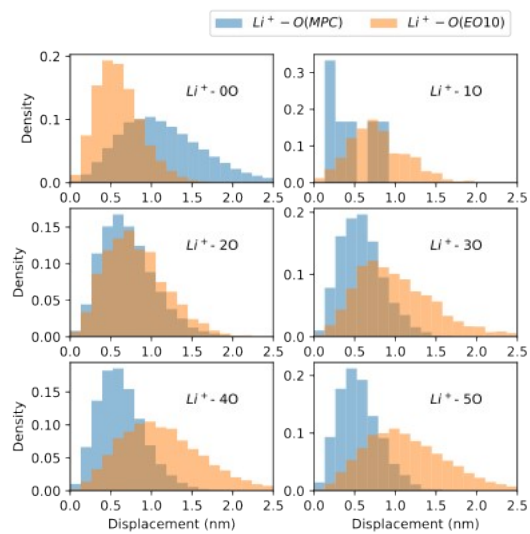

(a)

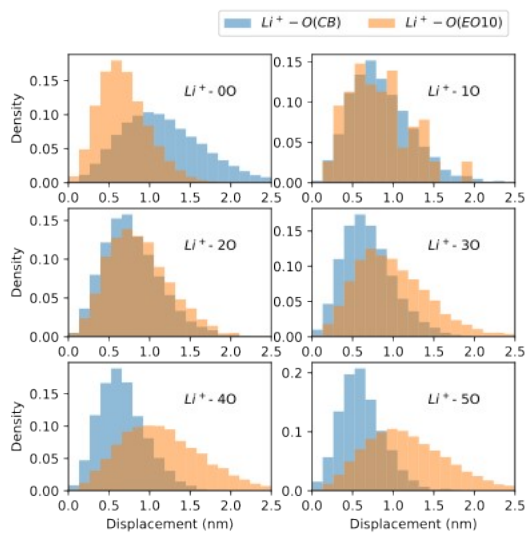

(b)

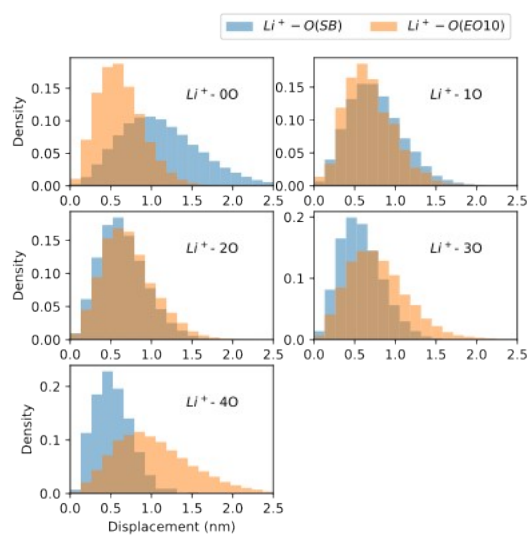

(c)

**Figure S11.** Distribution of distance traveled by  $\text{Li}^+$  ions in a specific O coordination number over 2-ns for systems (a) with MPC, (b) with CB, and (c) with SB in case-B systems at 600K.

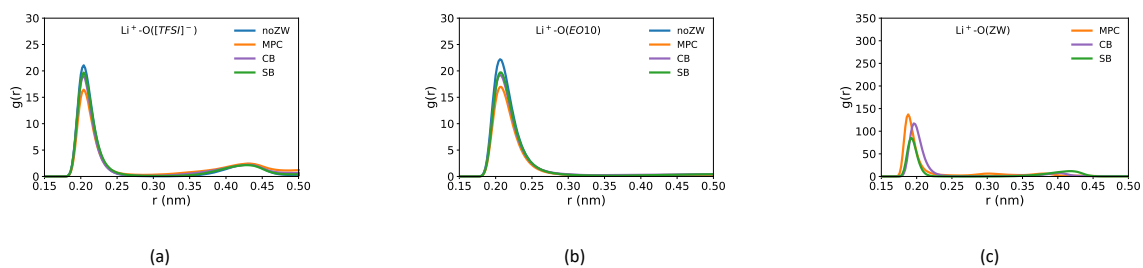

Figure S12. Radial distribution functions of (a)  $\text{Li}^+$ -O([TFSI]<sup>-</sup>), (b)  $\text{Li}^+$ -O(EO<sub>10</sub>) and (c)  $\text{Li}^+$ -O(ZW) in case-A systems at 353K.

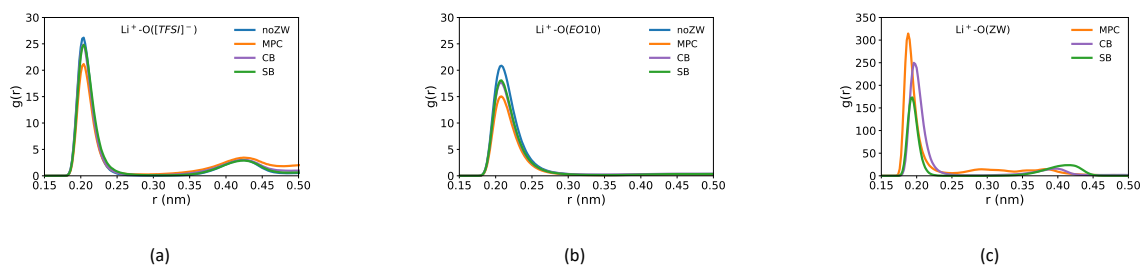

Figure S13. Radial distribution functions of (a)  $\text{Li}^+$ -O([TFSI]<sup>-</sup>), (b)  $\text{Li}^+$ -O(EO<sub>10</sub>) and (c)  $\text{Li}^+$ -O(ZW) in case-B systems at 353K.

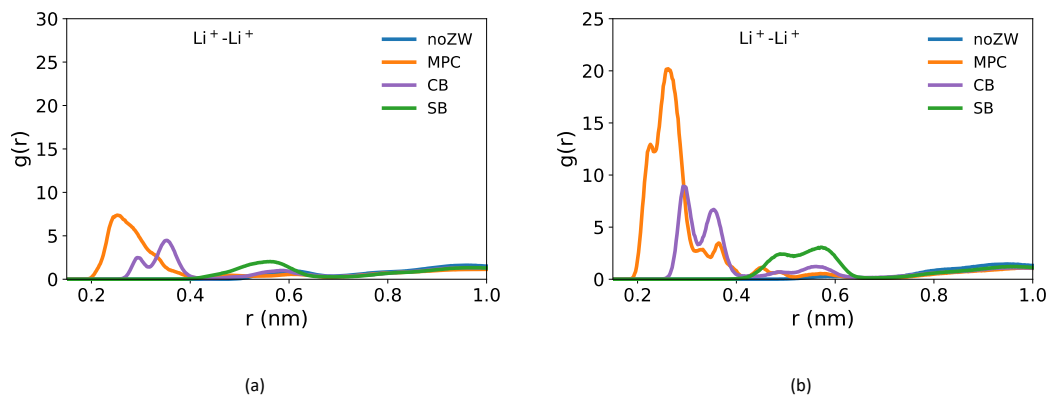

Figure S14. Radial distribution functions of  $\text{Li}^+$ - $\text{Li}^+$  in (a) case-A and (b) case-B systems at 353K.

**Table S6.** Association numbers of Li<sup>+</sup>-O in case-A systems at 353K

|                                          | No ZW       | MPC         | SB          | CB          |
|------------------------------------------|-------------|-------------|-------------|-------------|
| Total                                    | 6.42 ± 0.01 | 6.18 ± 0.03 | 6.09 ± 0.01 | 6.17 ± 0.02 |
| Li <sup>+</sup> -O(ZW)                   | N/A         | 1.51 ± 0.05 | 0.60 ± 0.01 | 0.78 ± 0.03 |
| Li <sup>+</sup> -O([TFSI] <sup>-</sup> ) | 1.94 ± 0.03 | 1.42 ± 0.03 | 1.72 ± 0.04 | 1.64 ± 0.02 |
| Li <sup>+</sup> -O(EO <sub>10</sub> )    | 4.47 ± 0.03 | 3.24 ± 0.02 | 3.77 ± 0.05 | 3.75 ± 0.05 |

**Table S7.** Association numbers of Li<sup>+</sup>-O in case-B systems at 353K

|                                          | No ZW       | MPC         | SB          | CB          |
|------------------------------------------|-------------|-------------|-------------|-------------|
| Total                                    | 6.75 ± 0.01 | 6.42 ± 0.08 | 6.37 ± 0.01 | 6.47 ± 0.03 |
| Li <sup>+</sup> -O(ZW)                   | N/A         | 1.46 ± 0.09 | 0.58 ± 0.01 | 0.76 ± 0.03 |
| Li <sup>+</sup> -O([TFSI] <sup>-</sup> ) | 0.95 ± 0.02 | 0.74 ± 0.04 | 0.98 ± 0.04 | 0.95 ± 0.04 |
| Li <sup>+</sup> -O(EO <sub>10</sub> )    | 5.80 ± 0.03 | 4.22 ± 0.19 | 4.81 ± 0.04 | 4.76 ± 0.08 |

**Table S8.** Percentage of Li<sup>+</sup> not coordinating with EO<sub>10</sub> for systems at 353K

| System | CB       | MPC      | noZW    | SB       |
|--------|----------|----------|---------|----------|
| A      | 21 ± 3 % | 35 ± 1 % | 8 ± 1 % | 20 ± 2 % |
| B      | 10 ± 3 % | 23 ± 5 % | 0       | 7 ± 1 %  |

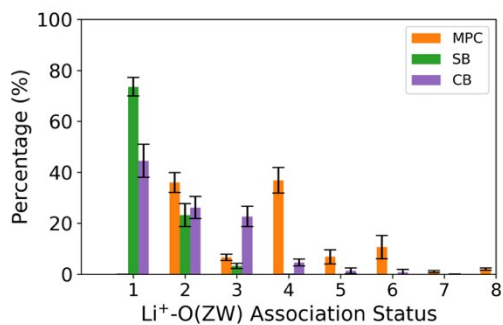

(a)

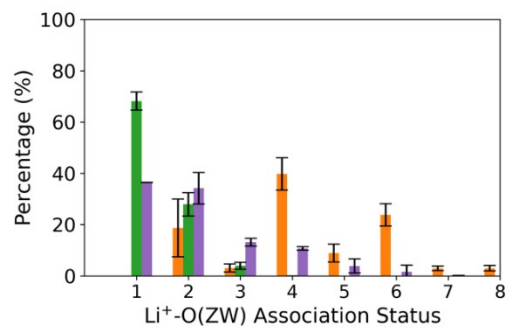

(b)

**Figure S15.** Association statuses of Li<sup>+</sup>-O(ZW) in (a) case-A, and (b) case-B systems 353K. Colors correspond to the presence of ZW molecules, as shown in the legends in Figure S15a.

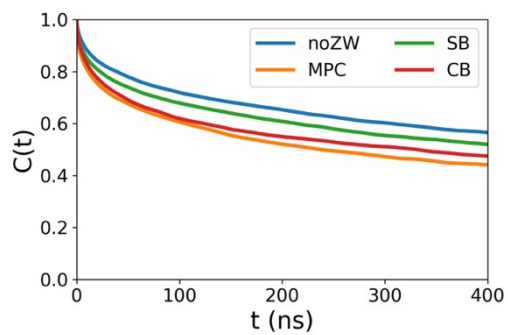

(a)

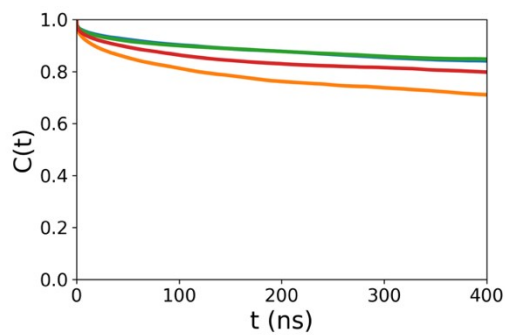

(b)

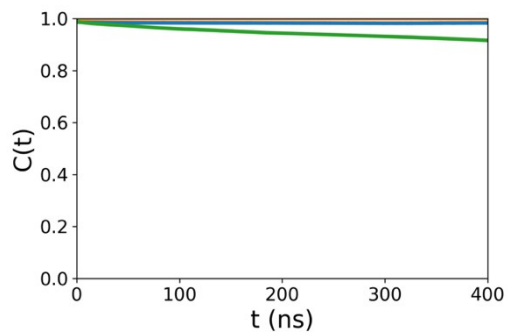

(c)

**Figure S16.** Residence C(t) curves of (a) Li<sup>+</sup>-O(TFSI)<sup>-</sup> in, (b) Li<sup>+</sup>-O(EO<sub>10</sub>) and (c) Li<sup>+</sup>-O(ZW) in case-A systems at 353K. Colors correspond to the presence of ZW molecules, as shown in the legends in Figure S16a.

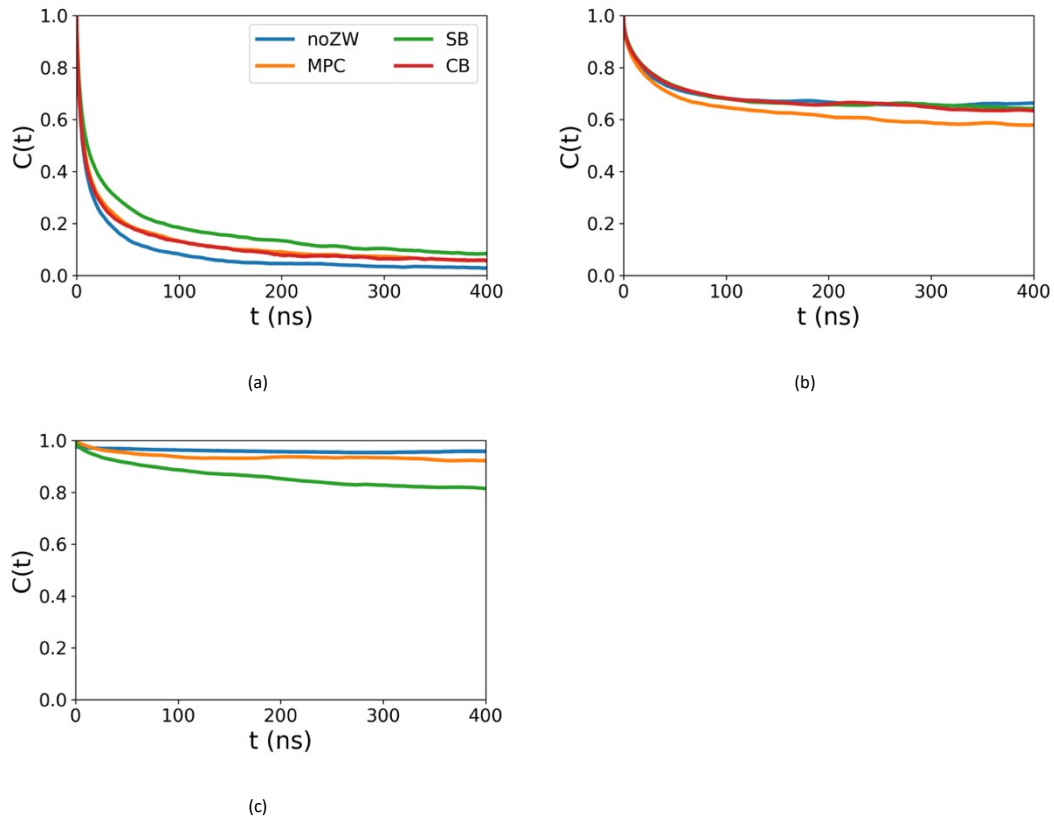

**Figure S17.** Residence  $C(t)$  curves of (a)  $\text{Li}^+\text{-O}([\text{TFSI}])$ , (b)  $\text{Li}^+\text{-O}(\text{EO}_{10})$  and (c)  $\text{Li}^+\text{-O}(\text{ZW})$  in case-B systems at 353K. Colors correspond to the presence of ZW molecules, as shown in the legends in Figure S17a.

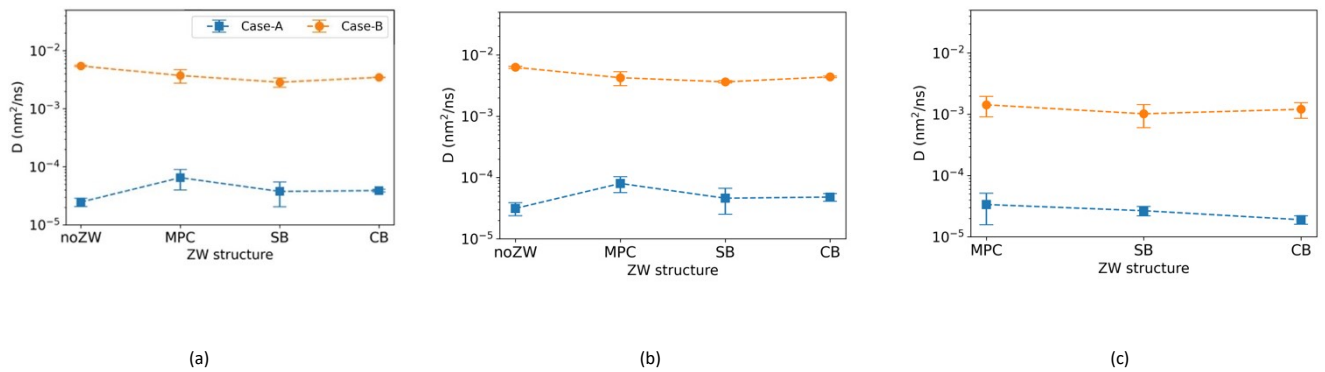

**Figure S18.** Diffusion coefficients of (a)  $\text{Li}^+$ , (b)  $[\text{TFSI}]$ , and (c) ZW for systems at 353K. Colors correspond to the  $\text{Li}^+\text{:O}(\text{EO}_{10})$  molar ratios -  $r$ , as shown in the legends in Figure S18a.
